# Supplementary material for: Hydrological and soil physiochemical variables determine the rhizospheric microbiota in subtropical lakeshore areas
Source: PeerJ journal article supplement (doi:10.7717/peerj.10078), 2020-09-29
Supplement: Figure_S1.pdf [file Figure_S1.pdf]

(A)

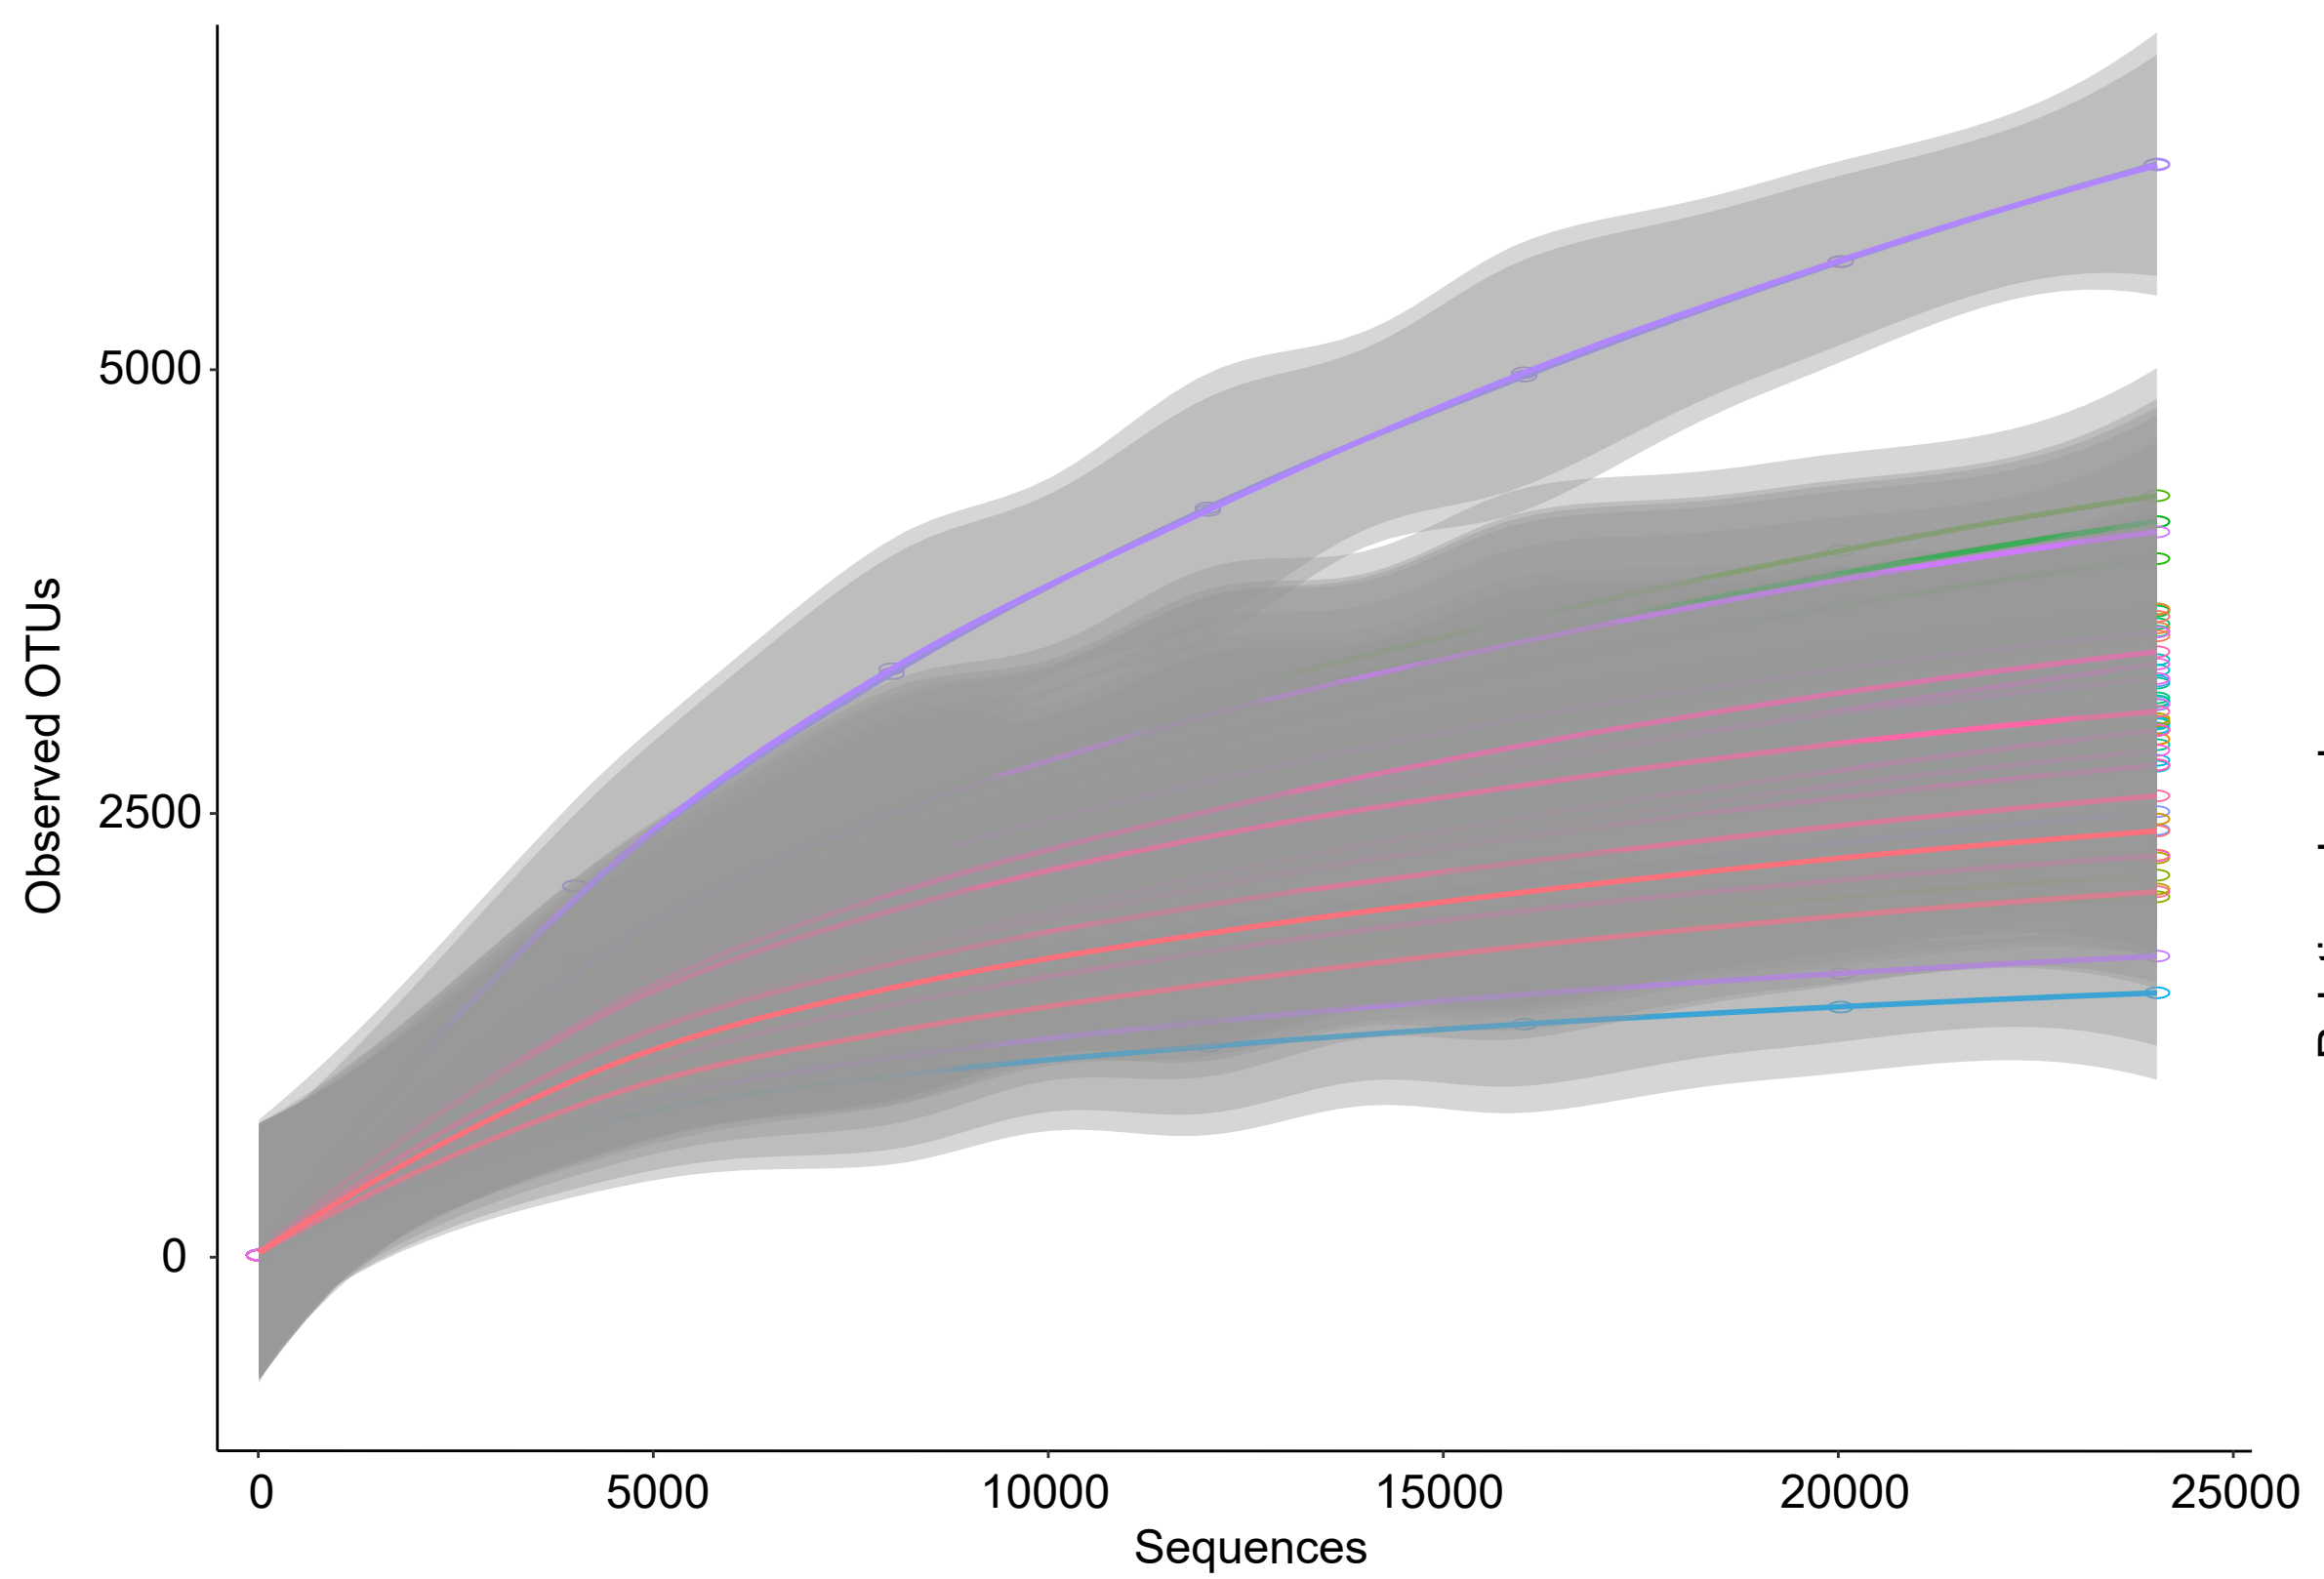

(B)

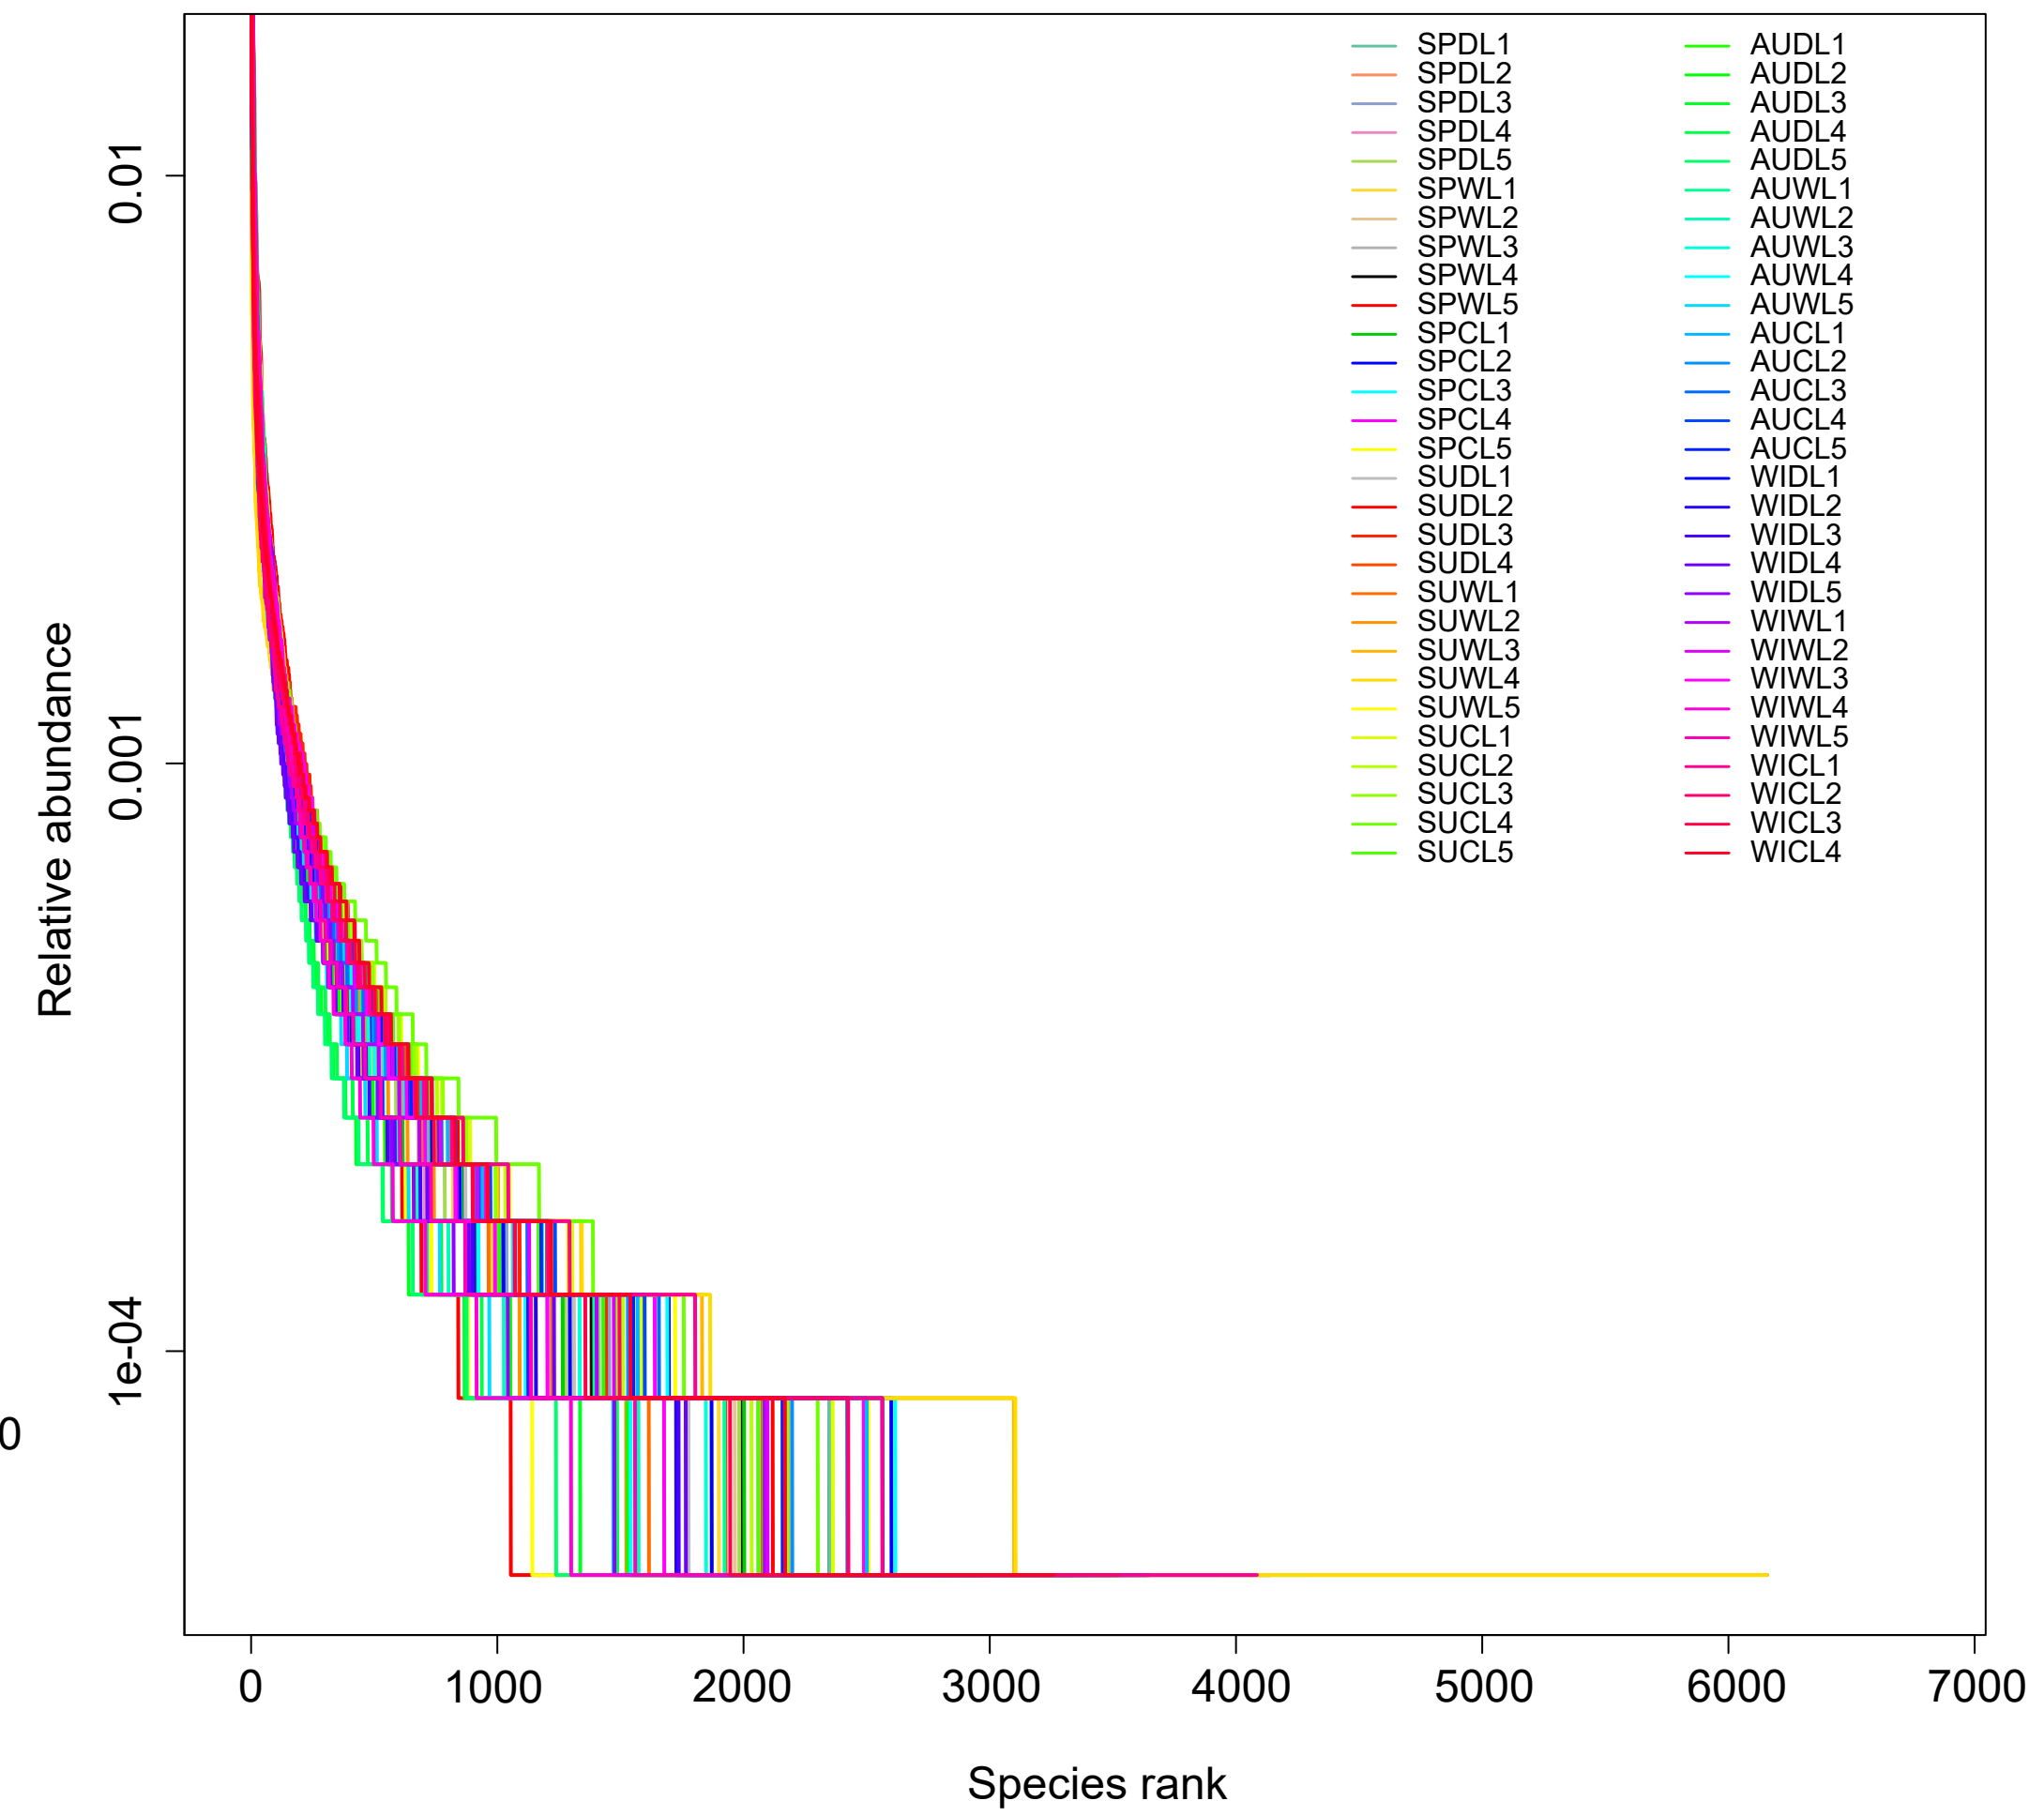

- |         |         |         |         |         |         |         |         |         |         |         |         |
|---------|---------|---------|---------|---------|---------|---------|---------|---------|---------|---------|---------|
| — AUCL1 | — AUDL1 | — AUWL1 | — SPCL1 | — SPDL1 | — SPWL1 | — SUCL1 | — SUDL1 | — SUWL2 | — WICL2 | — WIDL3 | — WIWL3 |
| — AUCL2 | — AUDL2 | — AUWL2 | — SPCL2 | — SPDL2 | — SPWL2 | — SUCL2 | — SUDL2 | — SUWL3 | — WICL3 | — WIDL4 | — WIWL4 |
| — AUCL3 | — AUDL3 | — AUWL3 | — SPCL3 | — SPDL3 | — SPWL3 | — SUCL3 | — SUDL3 | — SUWL4 | — WICL4 | — WIDL5 | — WIWL5 |
| — AUCL4 | — AUDL4 | — AUWL4 | — SPCL4 | — SPDL4 | — SPWL4 | — SUCL4 | — SUDL4 | — SUWL5 | — WIDL1 | — WIWL1 |         |
| — AUCL5 | — AUDL5 | — AUWL5 | — SPCL5 | — SPDL5 | — SPWL5 | — SUCL5 | — SUWL1 | — WICL1 | — WIDL2 | — WIWL2 |         |
