# Supplementary material for: Hydrological and soil physiochemical variables determine the rhizospheric microbiota in subtropical lakeshore areas
Source: PeerJ journal article supplement (doi:10.7717/peerj.10078), 2020-09-29

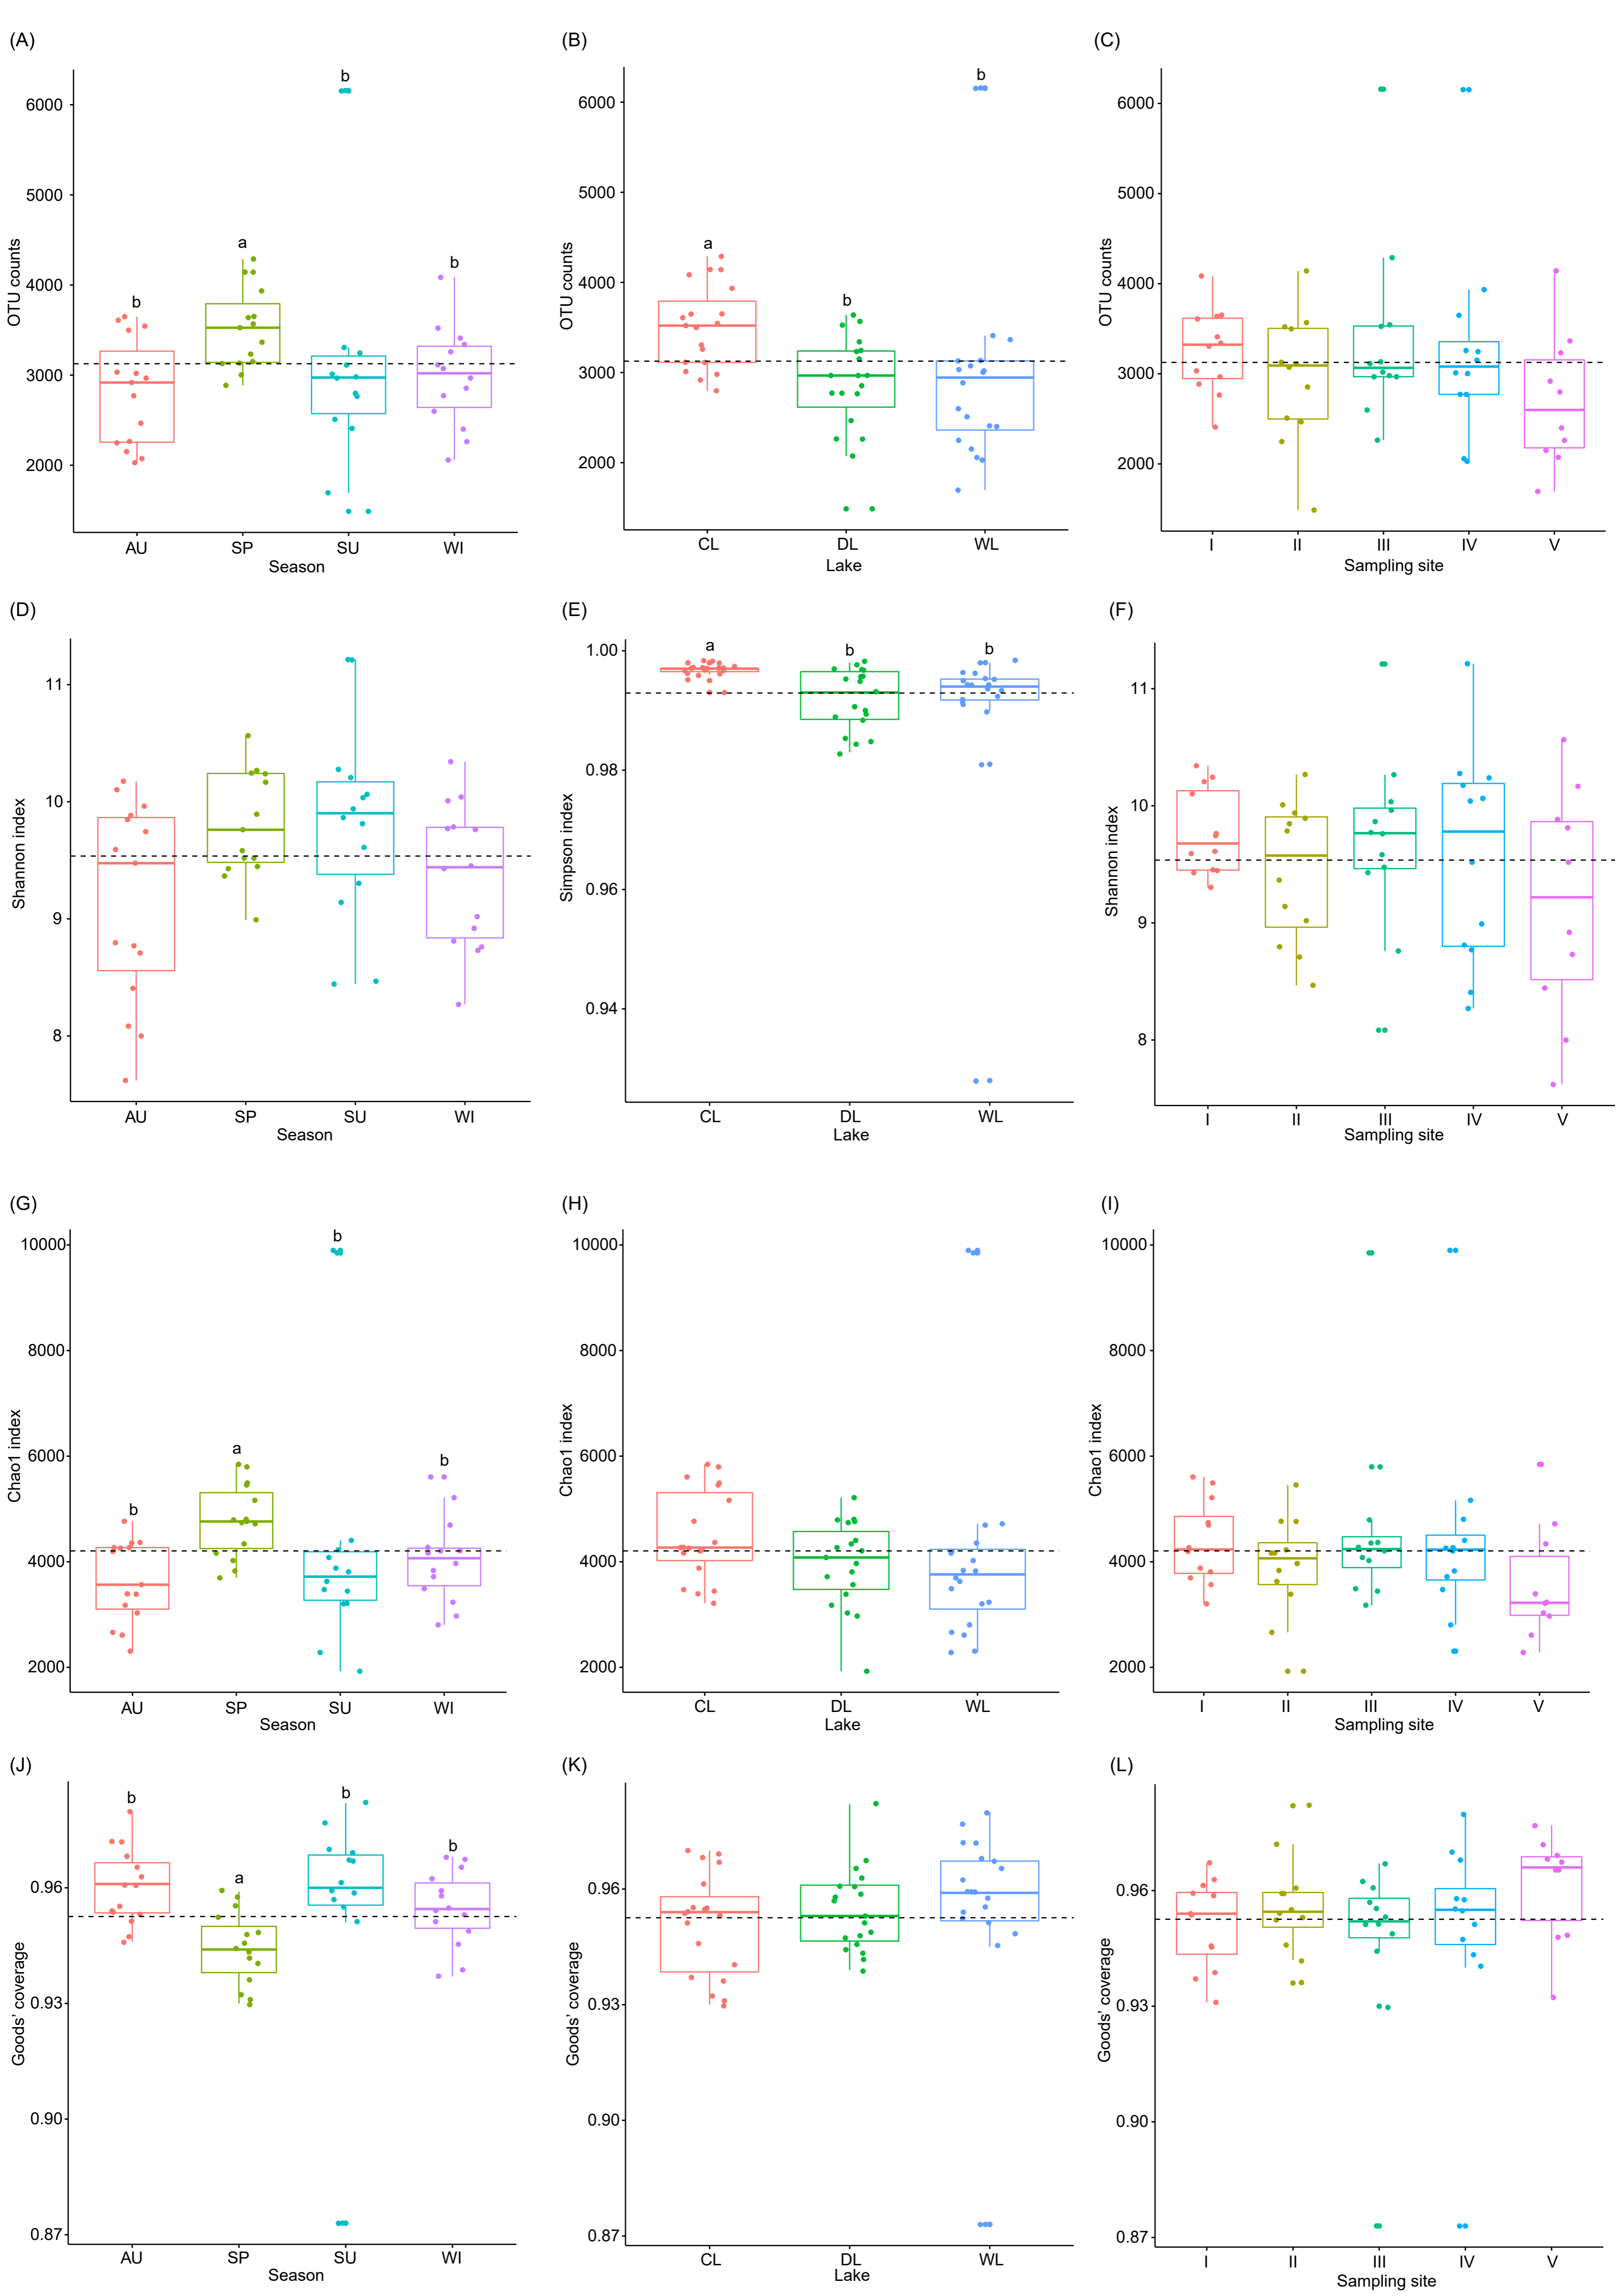

Supplement: Figure_S3.pdf [file Figure_S3.pdf]
