# Supplementary material for: Hydrological and soil physiochemical variables determine the rhizospheric microbiota in subtropical lakeshore areas
Source: PeerJ journal article supplement (doi:10.7717/peerj.10078), 2020-09-29

(A)

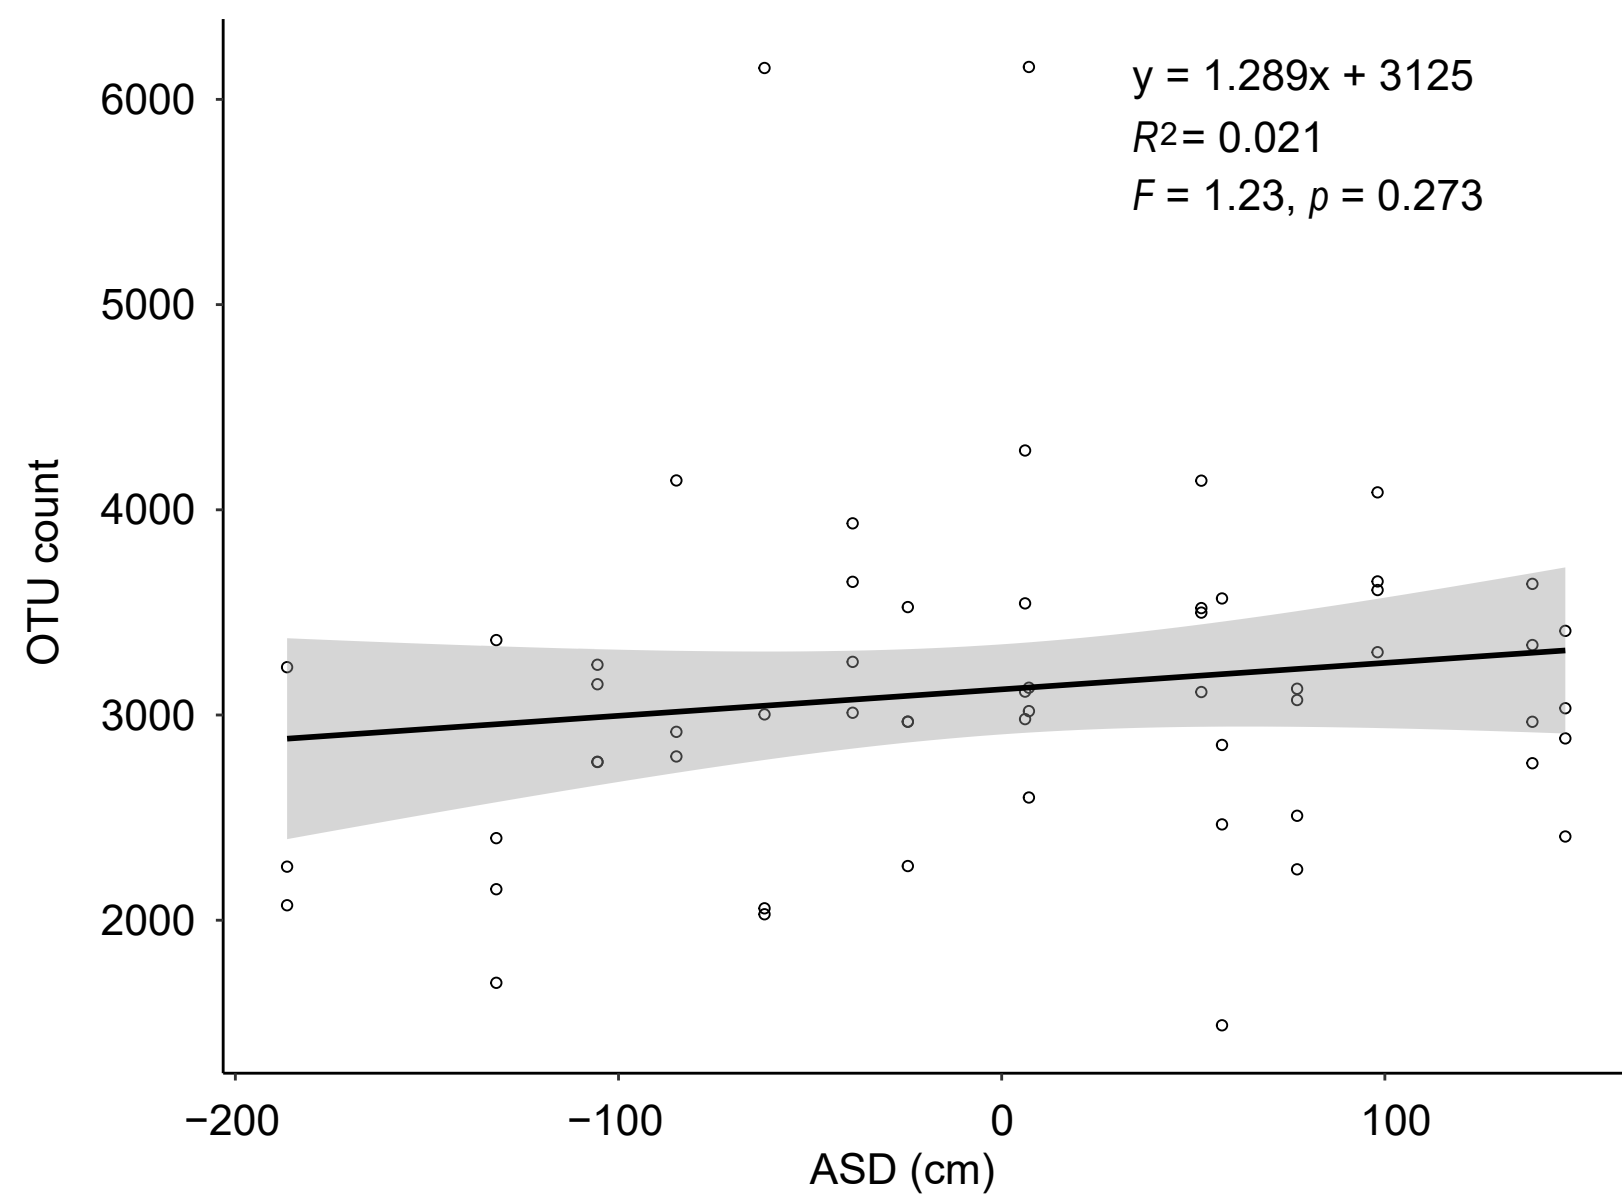

(B)

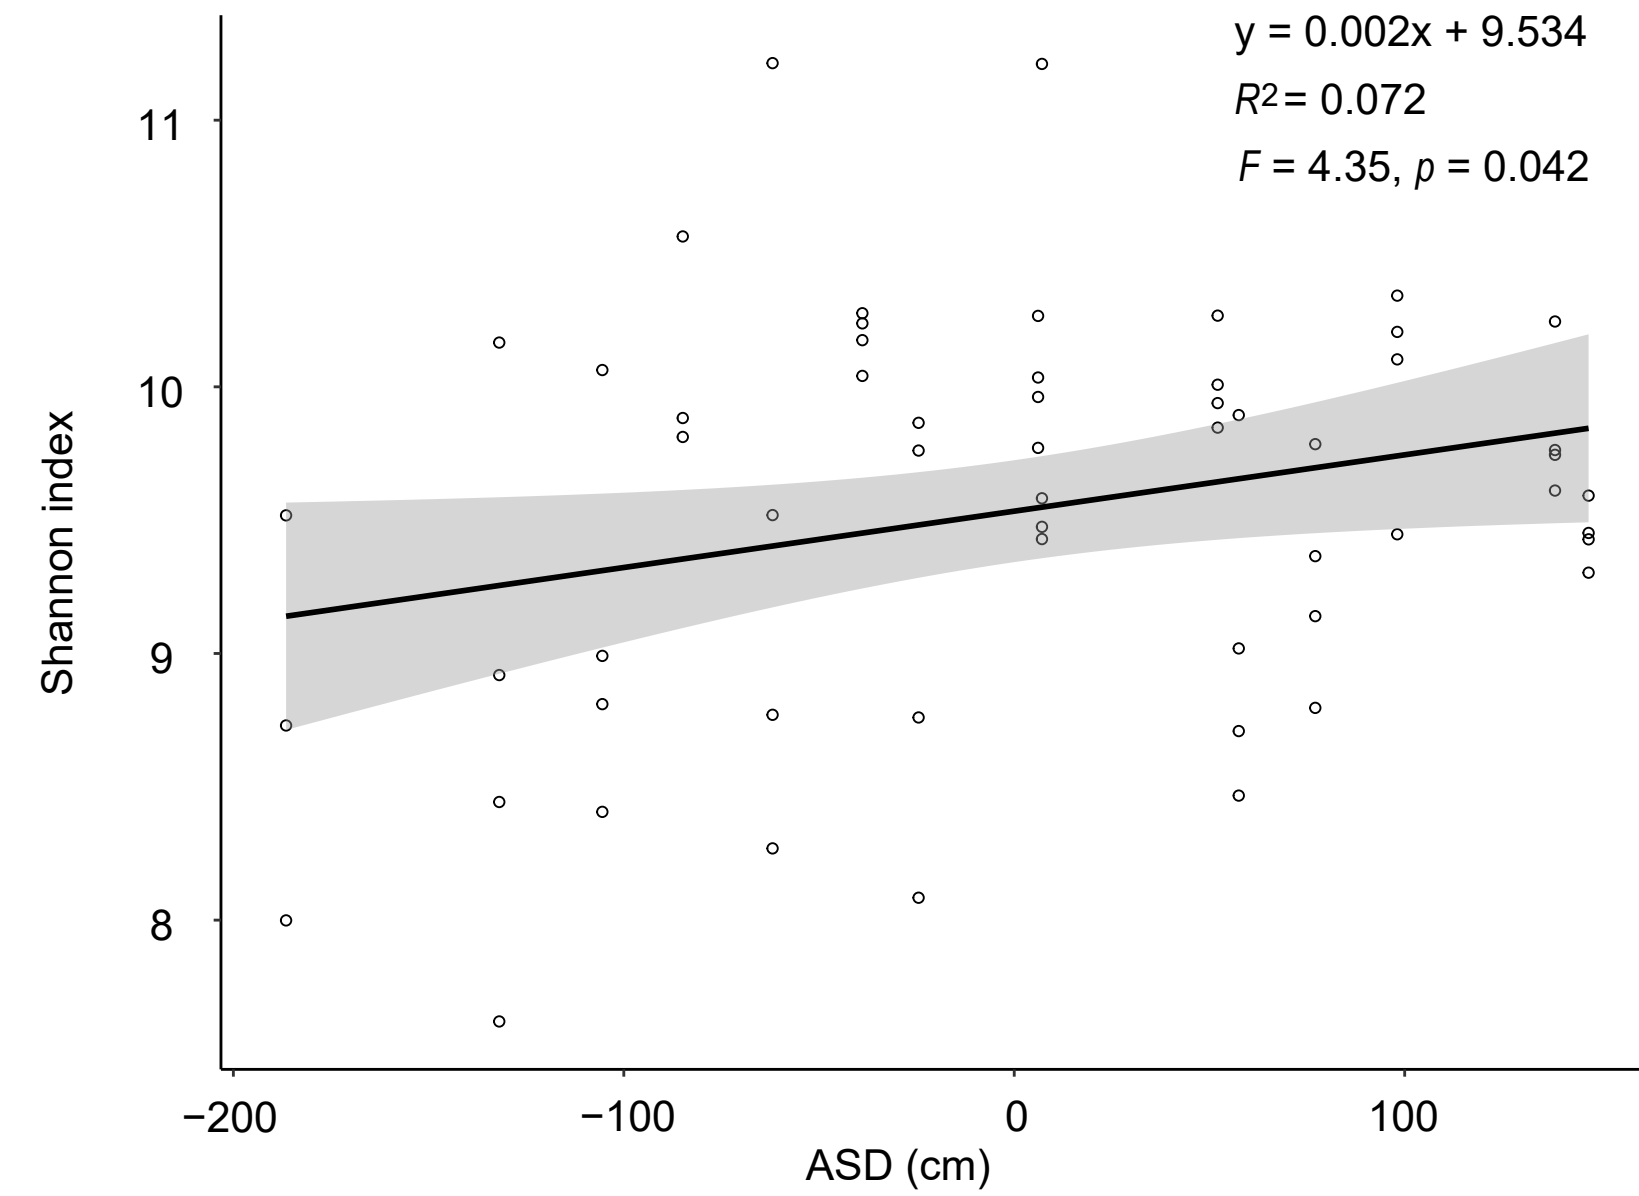

(C)

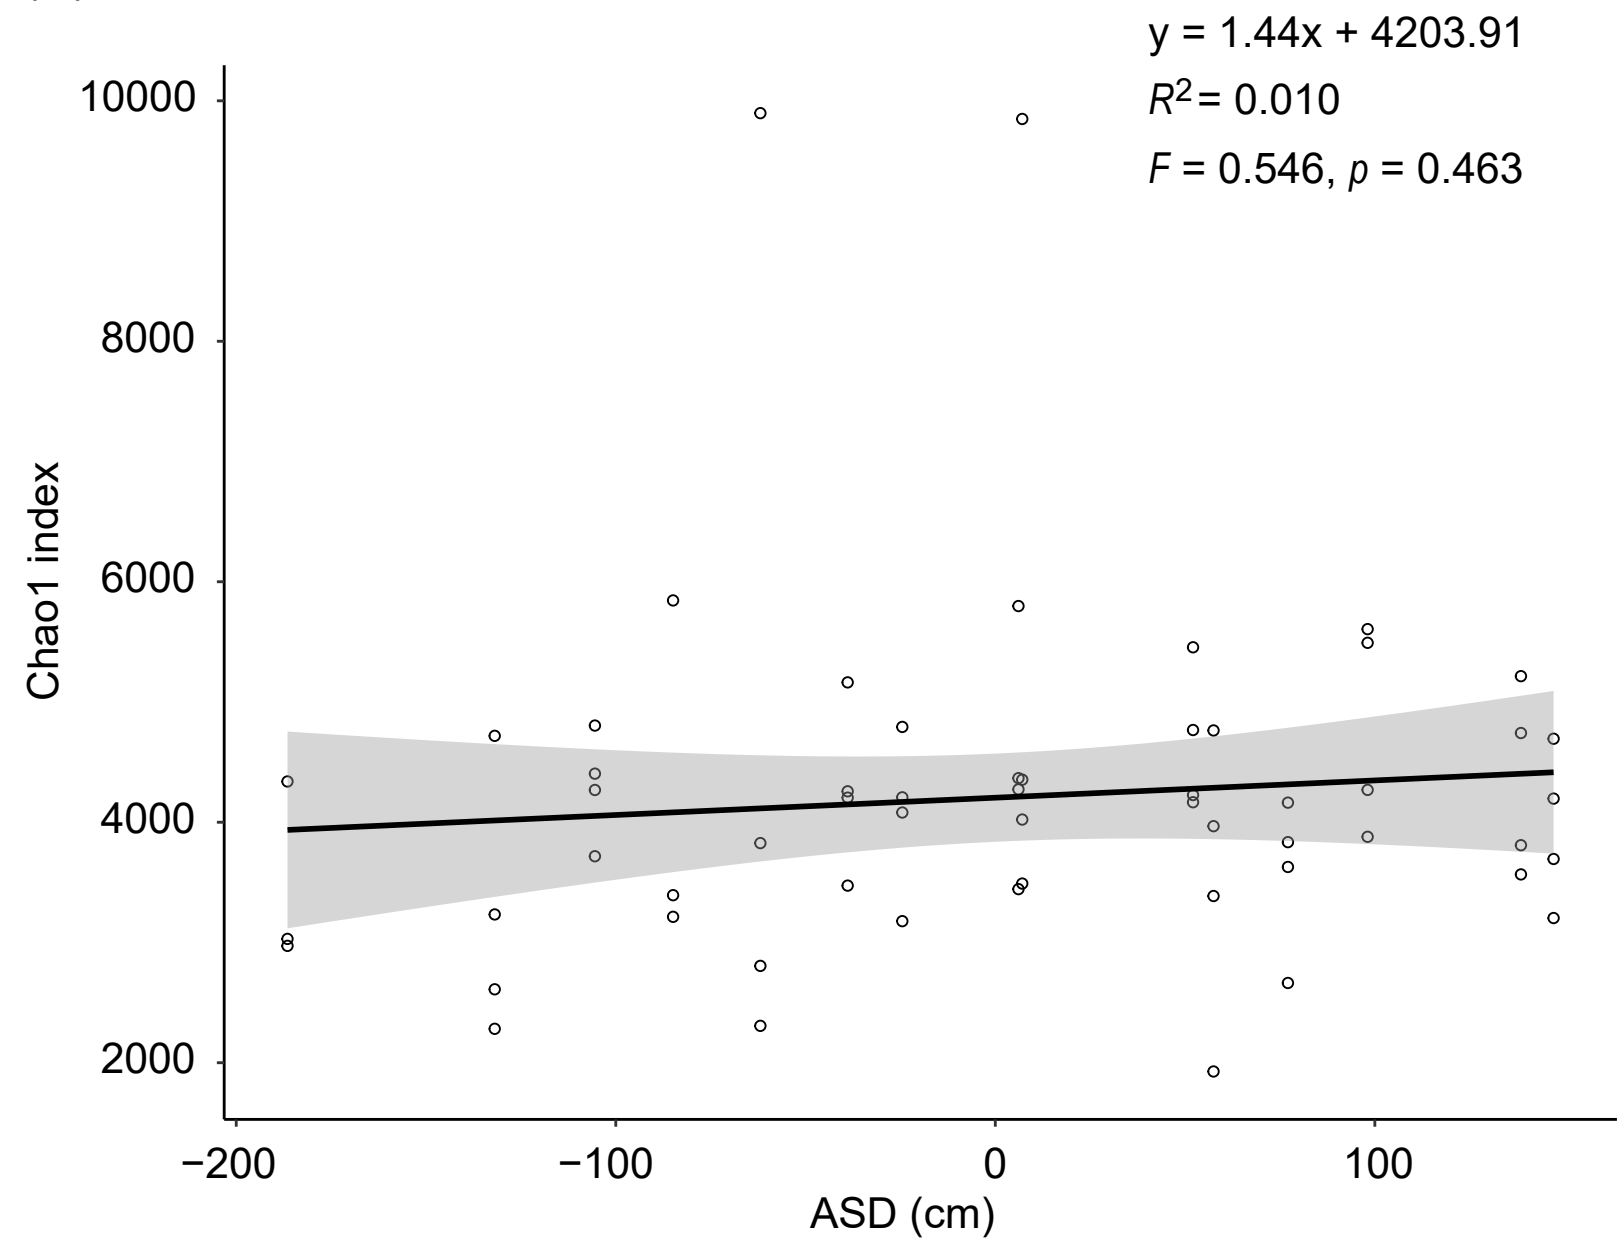

(D)

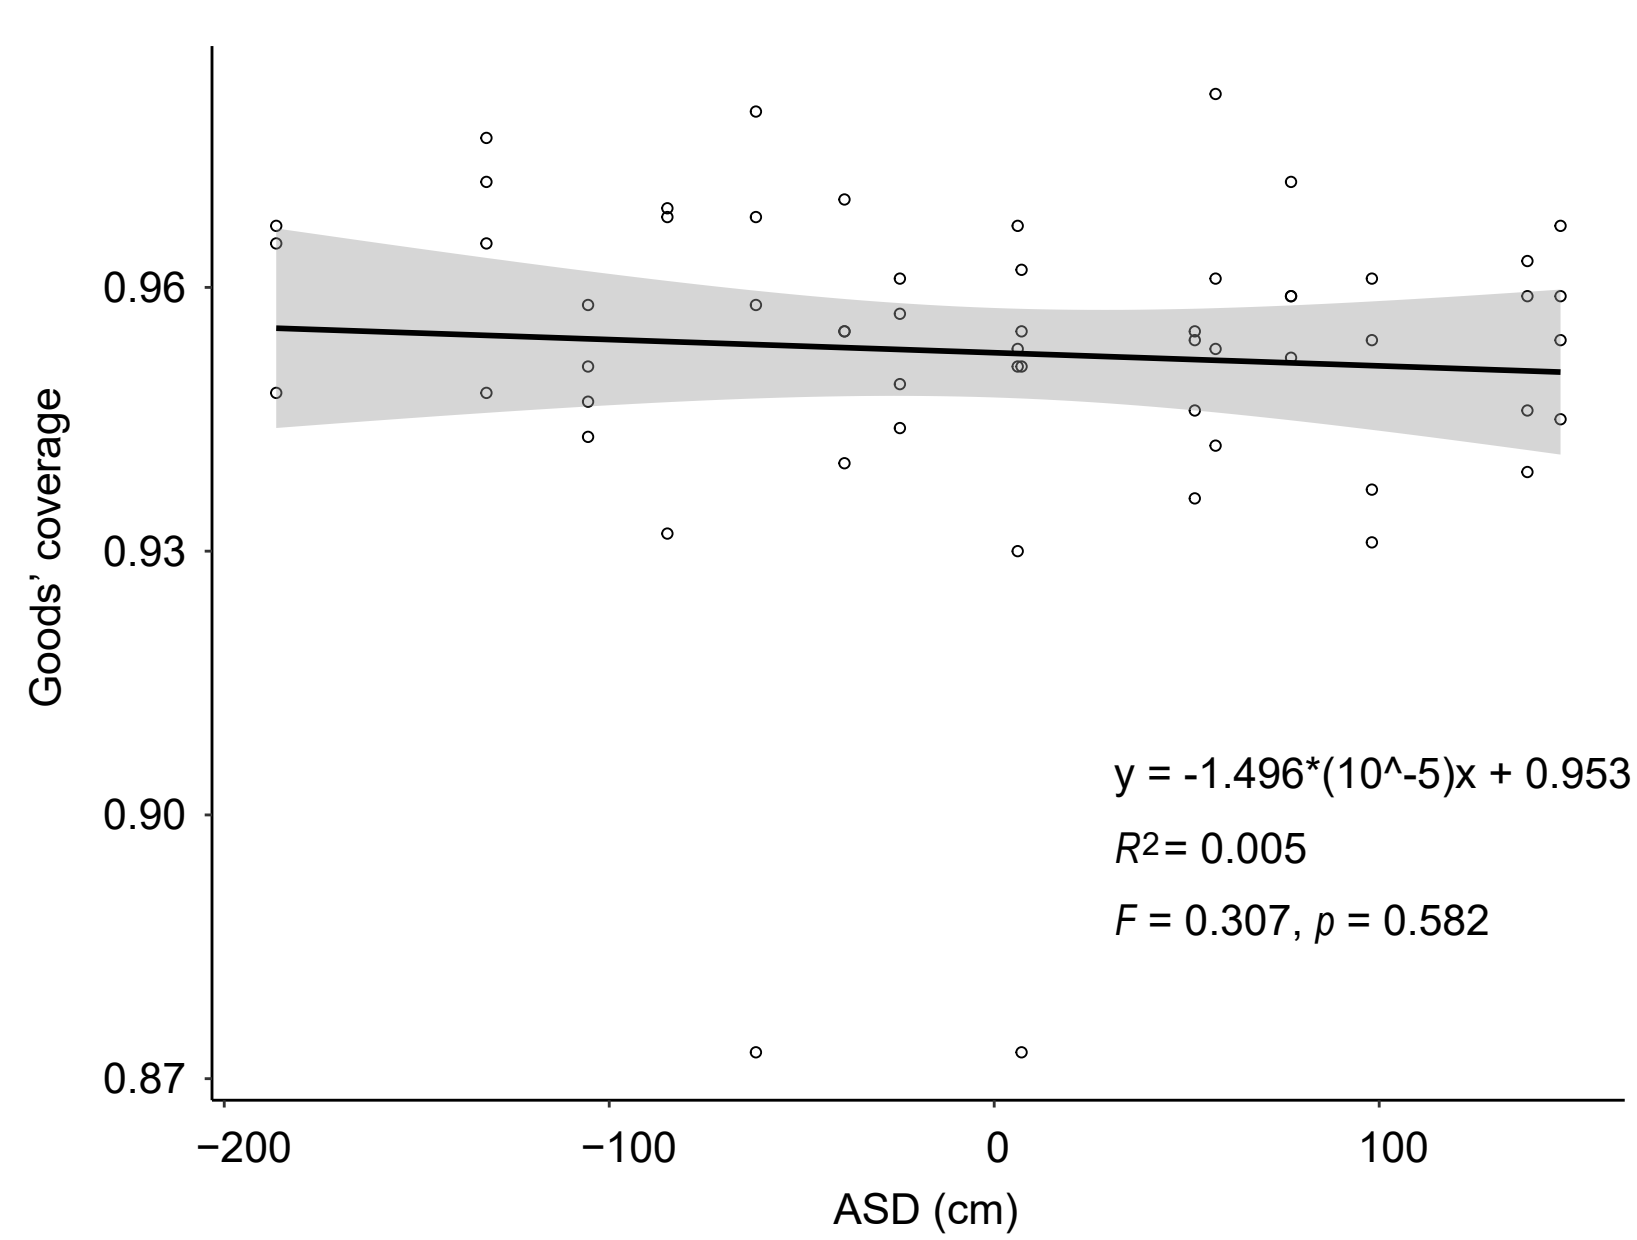

Supplement: Figure_S4.pdf [file Figure_S4.pdf]
